# Supplementary material for: Elderly Gliobastoma Patients: The Impact of Surgery and Adjuvant Treatments on Survival: A Single Institution Experience
Source: MDPI journal article supplement (doi:10.3390/brainsci12050632), 2022-05-11
Supplement: s1 [file s1]

Supplementary Table S1. Baseline characteristics, treatment modalities and outcome of patients according to sex.

|                             | Male            | Female         | p value |
|-----------------------------|-----------------|----------------|---------|
| Median age, years           | 70.0            | 72.0           | 0.420   |
| CCI > 3                     | 34/87 (39.1%)   | 22/48 (45.8%)  | 0.446   |
| KPS ≥ 70                    | 83/87 (95.4%)   | 44/48 (91.7%)  | 0.379   |
| <i>MGMT</i> p methylation   | 47/83 (56.6%)   | 23/45 (51.1%)  | 0.550   |
| Extent of resection         |                 |                | 0.769   |
| Gross-total resection       | 16/87 (18.4%)   | 7/48 (14.6%)   |         |
| Subtotal resection          | 64/87 (73.6%)   | 38/48 (79.2%)  |         |
| Biopsy                      | 7/87 (8.0%)     | 3/48 (6.3%)    |         |
| Complications after surgery | 25/87 (28.7%)   | 11/48 (22.9%)  | 0.464   |
| Adjuvant Treatment          |                 |                | 0.468   |
| 6-week RT/TMZ + TMZ         | 24/87 (27.6%)   | 9/48 (18.8%)   |         |
| 3-week RT/TMZ + TMZ         | 24/87 (27.6%)   | 13/48 (27.1%)  |         |
| RT + TMZ                    | 6/87 (6.9%)     | 7/48 (14.6%)   |         |
| RT alone                    | 10/87 (11.5%)   | 4/87 (8.3%)    |         |
| TMZ upfront                 | 10/87 (11.5%)   | 4/87 (8.3%)    |         |
| Palliation                  | 13/87 (14.9%)   | 11/48 (22.9%)  |         |
| mPFS (months, 95% CI)       | 8.7 (5.4-12.0)  | 6.6 (3.5-9.6)  | 0.498   |
| mOS (months, 95% CI)        | 10.7 (7.5-13.8) | 9.2 (6.0-12.4) | 0.523   |

Abbreviations: CCI, Charlson Comorbidity Index; KPS, Karnofsky Performance Status; *MGMT*p, O(6)-methylguanyl DNA methyltransferase promoter; mOS, median overall survival; mPFS, median progression-free survival; RT, radiotherapy; TMZ, temozolomide.

Supplementary Table S2. Median progression-free survival and overall survival according to Charlson Comorbidity Index within different classes of age.

| Age Class | Age-adjusted<br>CCI* | Median Progression-free Survival |                         |             |         | Median Overall Survival |                         |             |         |
|-----------|----------------------|----------------------------------|-------------------------|-------------|---------|-------------------------|-------------------------|-------------|---------|
|           |                      | Months                           | 95% Confidence Interval |             | p value | Months                  | 95% Confidence Interval |             | p value |
|           |                      |                                  | Lower Bound             | Upper Bound |         |                         | Lower Bound             | Upper Bound |         |
| 65-69 yrs | ≤ 3                  | 8.1                              | 4.7                     | 11.5        | 0.002   | 12.9                    | 9.9                     | 15.8        | 0.006   |
|           | > 3                  | 1.0                              | 1.0                     | 1.1         |         | 4.4                     | 2.4                     | 6.4         |         |
| 70-74 yrs | ≤ 3                  | 8.2                              | 2.1                     | 14.3        | 0.950   | 10.0                    | 8.4                     | 11.6        | 0.975   |
|           | > 3                  | 12.7                             | /                       | /           |         | 16.2                    | /                       | /           |         |
| 75-79 yrs | ≤ 3                  | 4.3                              | 0.1                     | 8.9         | /       | 8.8                     | 7.1                     | 10.5        | /       |
|           | > 3 †                | Not applicable                   |                         |             |         | Not applicable          |                         |             |         |
| ≥ 80 yrs  | ≤ 3                  | 19.8                             | 11.3                    | 28.4        | 0.494   | 28.8                    | /                       | /           | 0.736   |
|           | > 3                  | 3.6                              | /                       | /           |         | 4.2                     | /                       | /           |         |

Abbreviations: CCI, Charlson Comorbidity Index; yrs, years. The 95% Confidence Interval was not obtained due to small patient sample in cells marked with '/'.

\*CCI was modified by subtracting the value attributed to age from the total score, to make comorbidities the only factors included in the index.

† No patient had CCI > 3 in the 75-79-year-old class of age.
